# Supplementary material for: Haplotype tagging reveals parallel formation of hybrid races in two butterfly species
Source: bioRxiv or medRxiv preprint supplement (doi:10.1101/2020.05.25.113688), 2020-06-06

# chr1

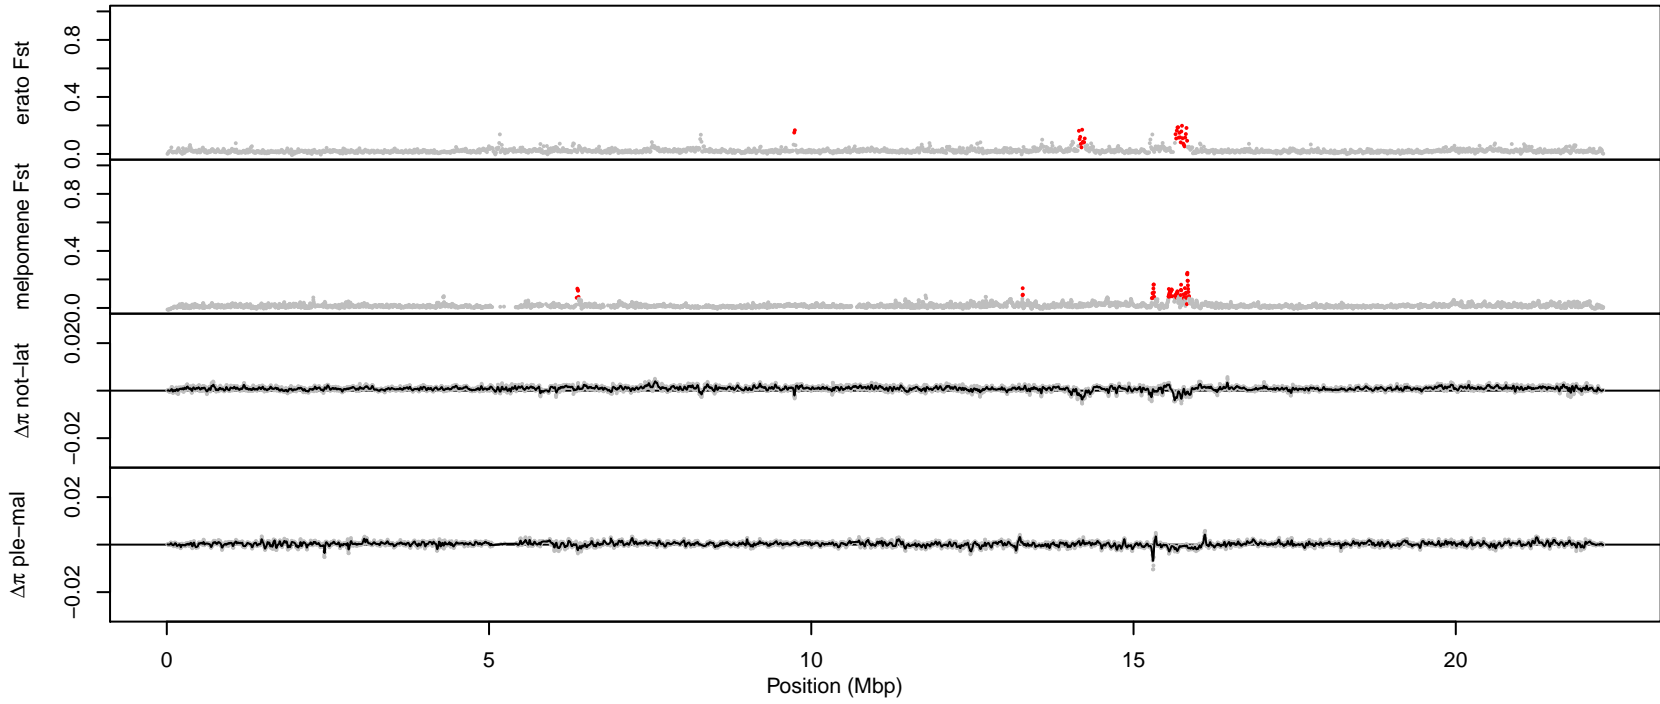

chr2

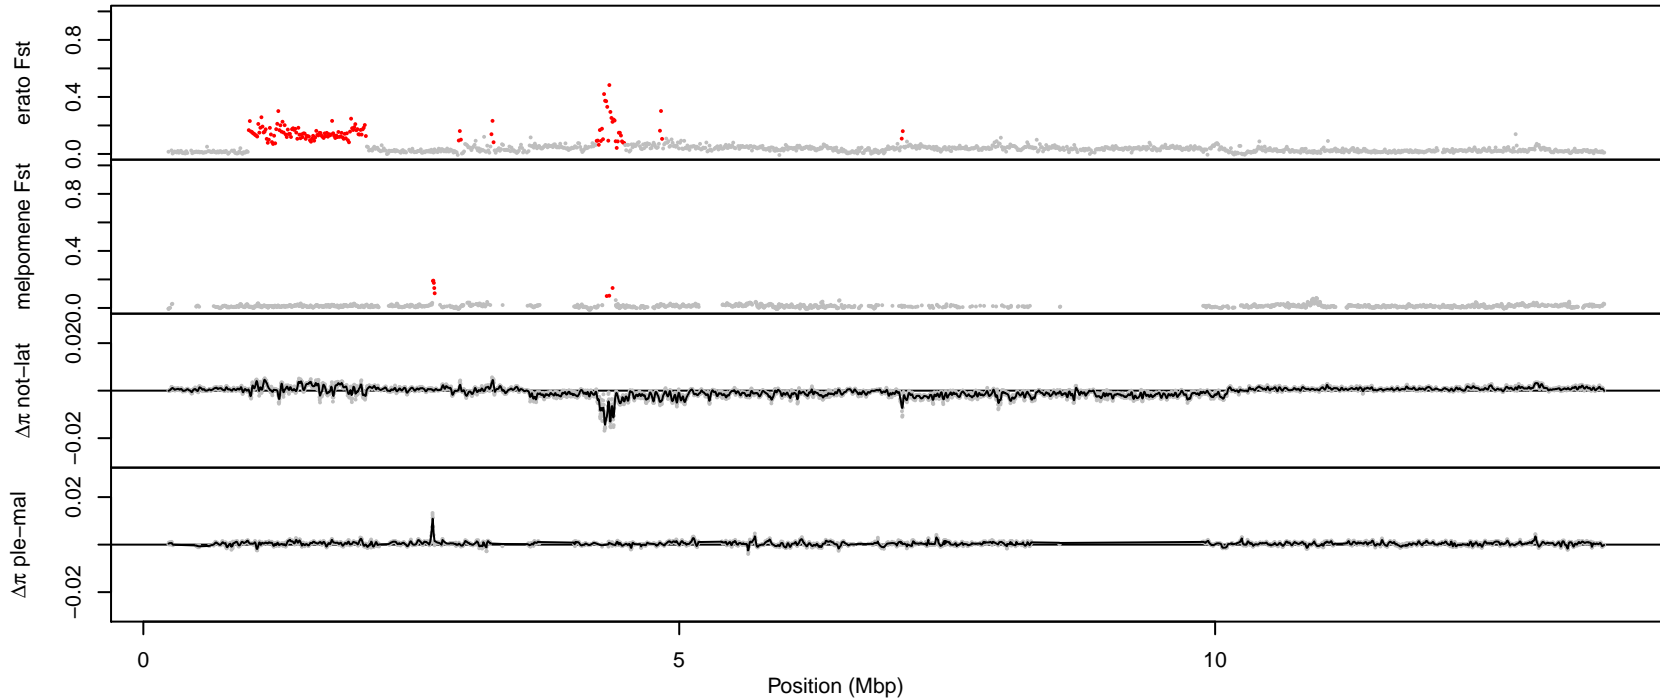

## chr3

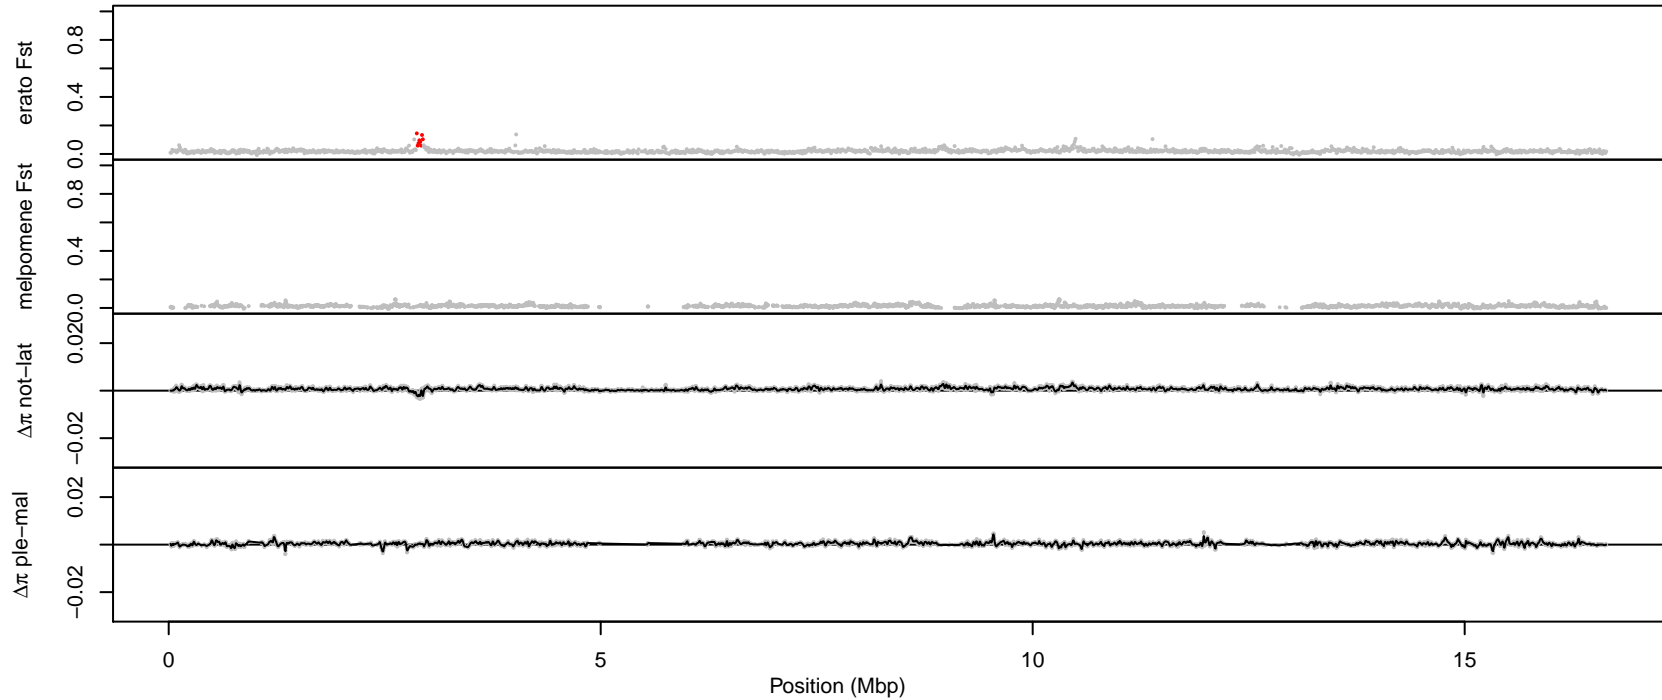

# chr4

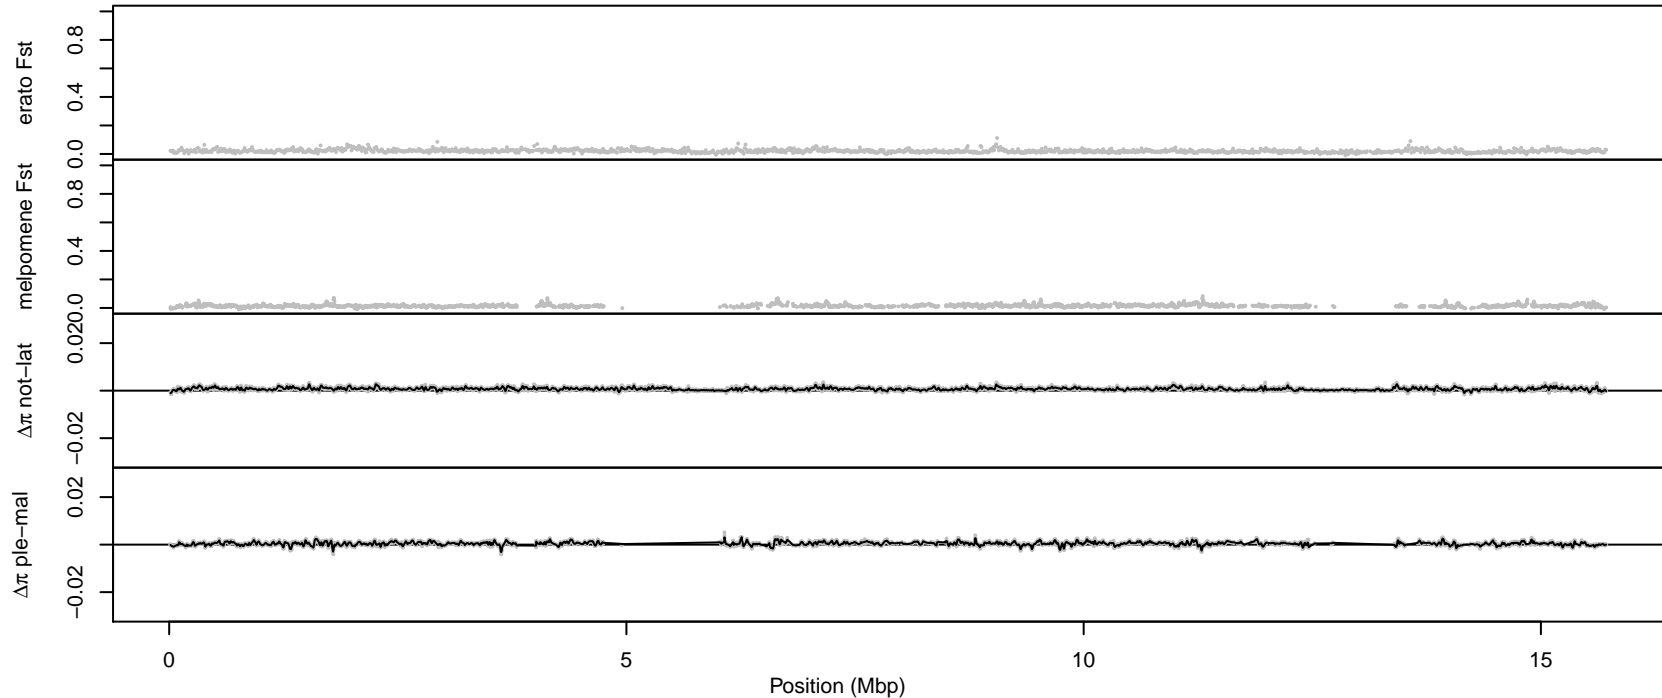

# chr5

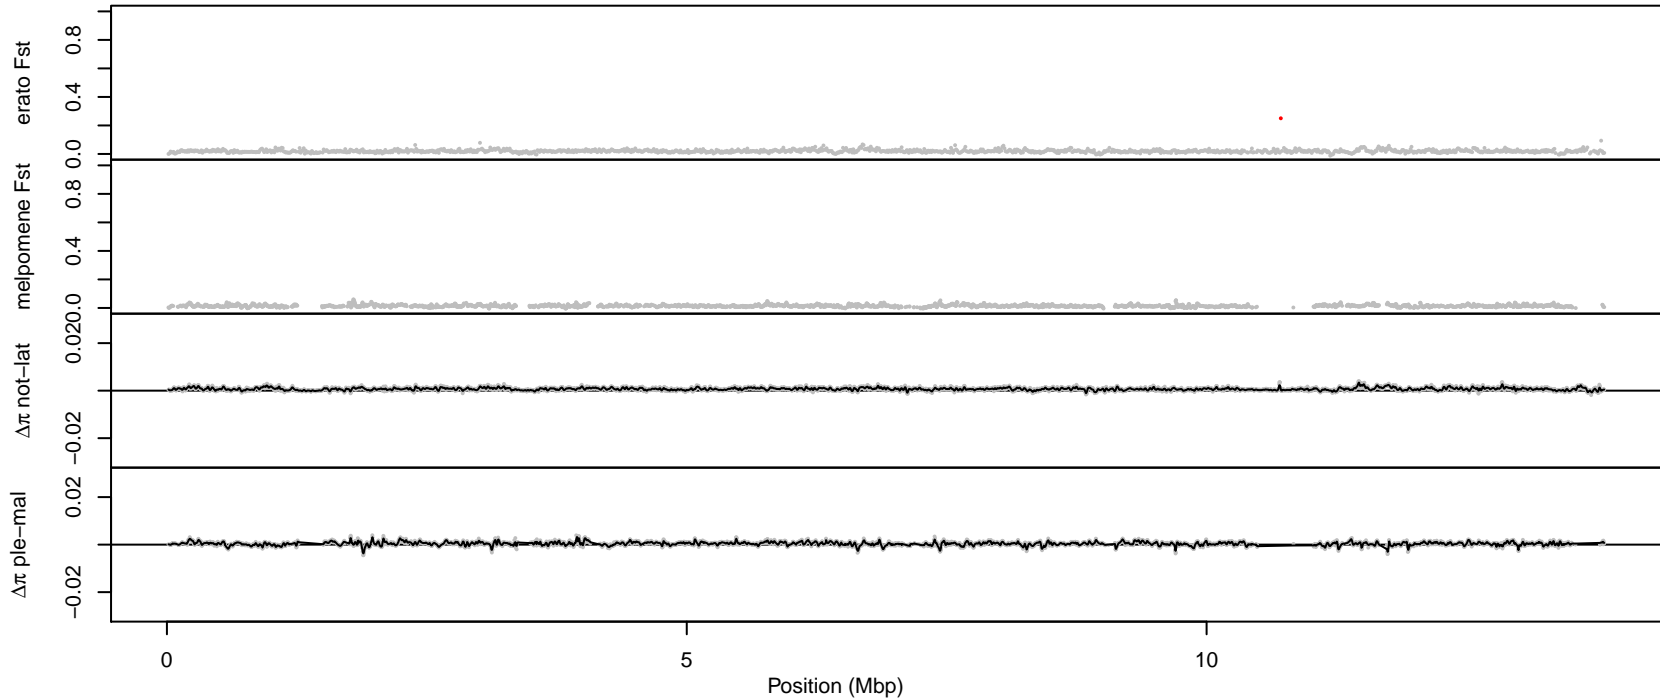

## chr6

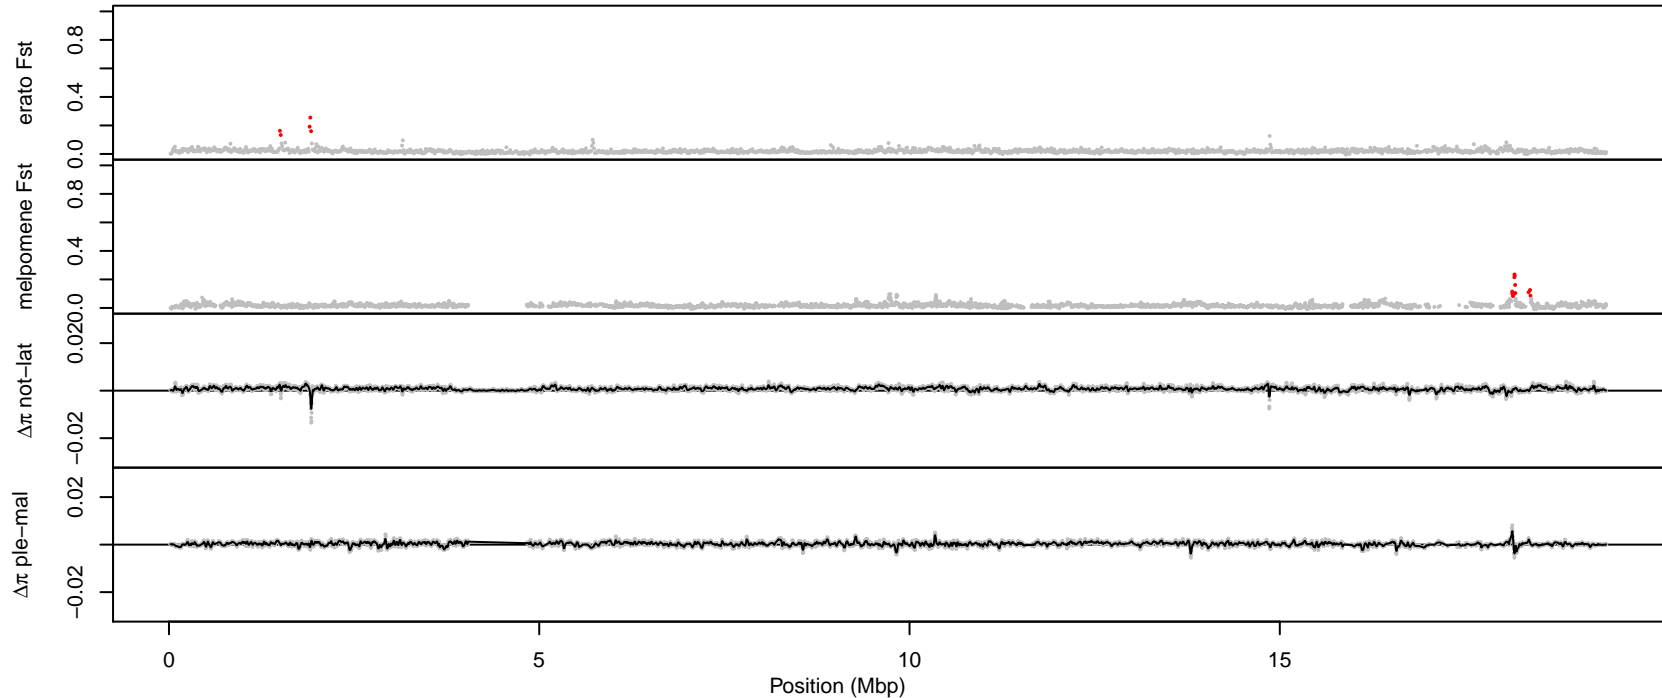

# chr7

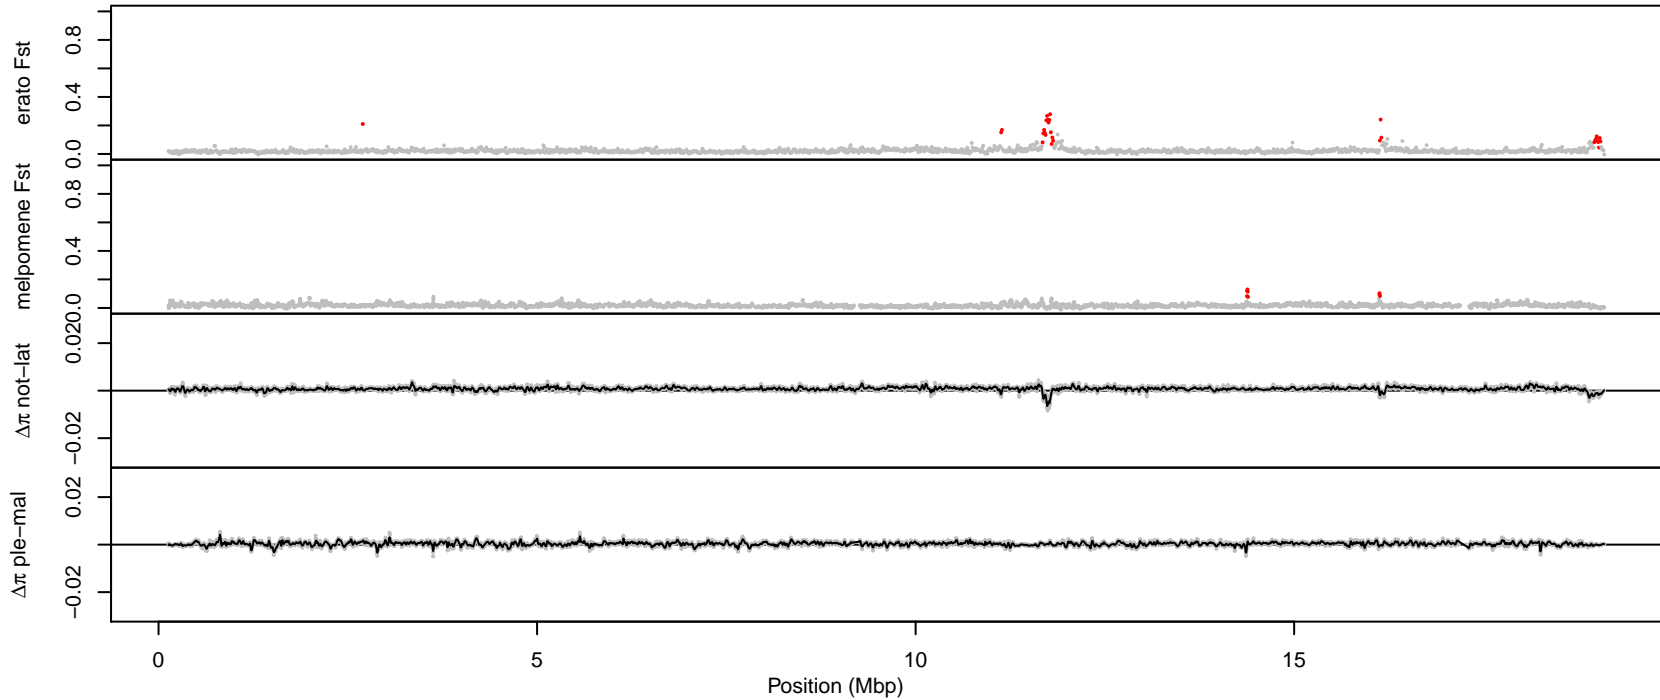

## chr8

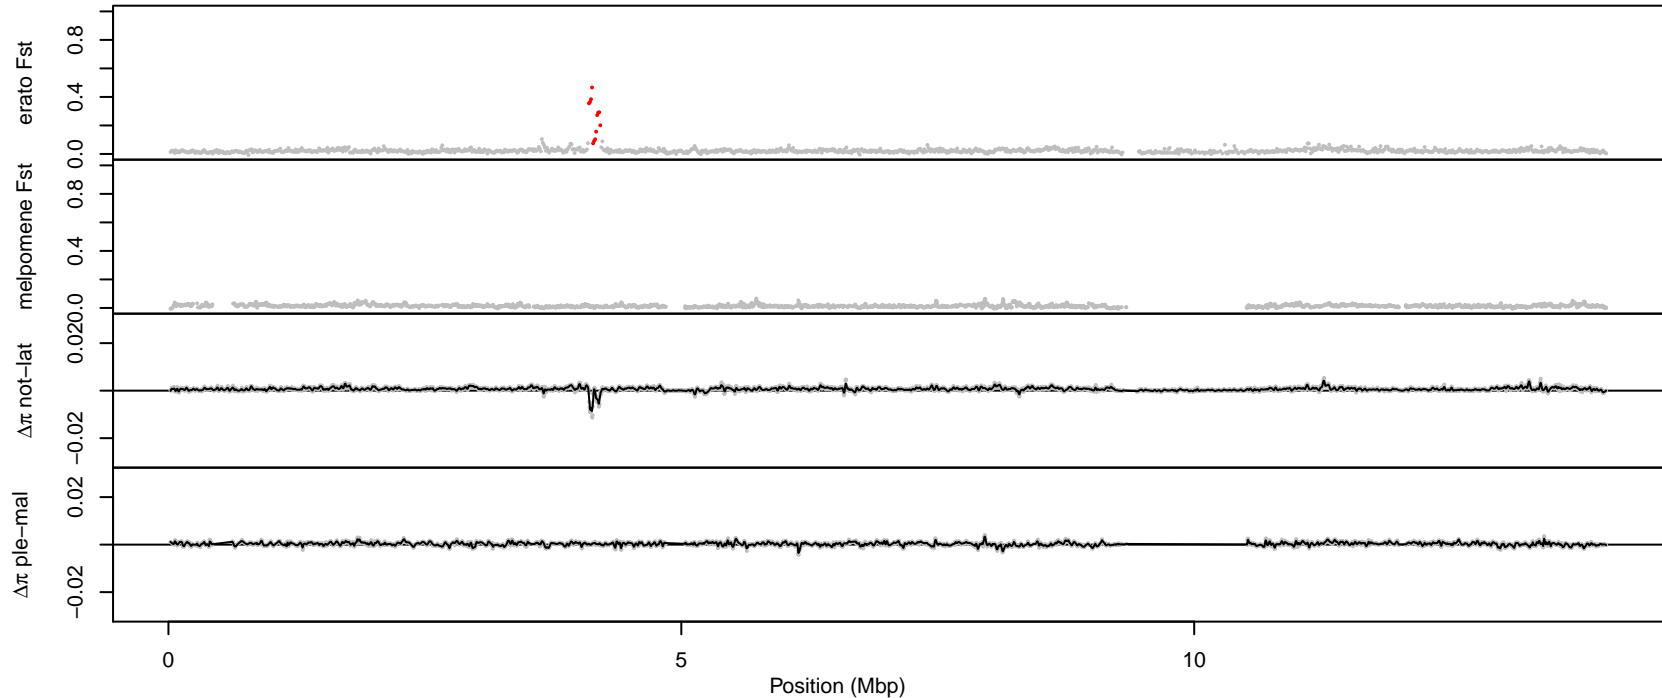



# chr9

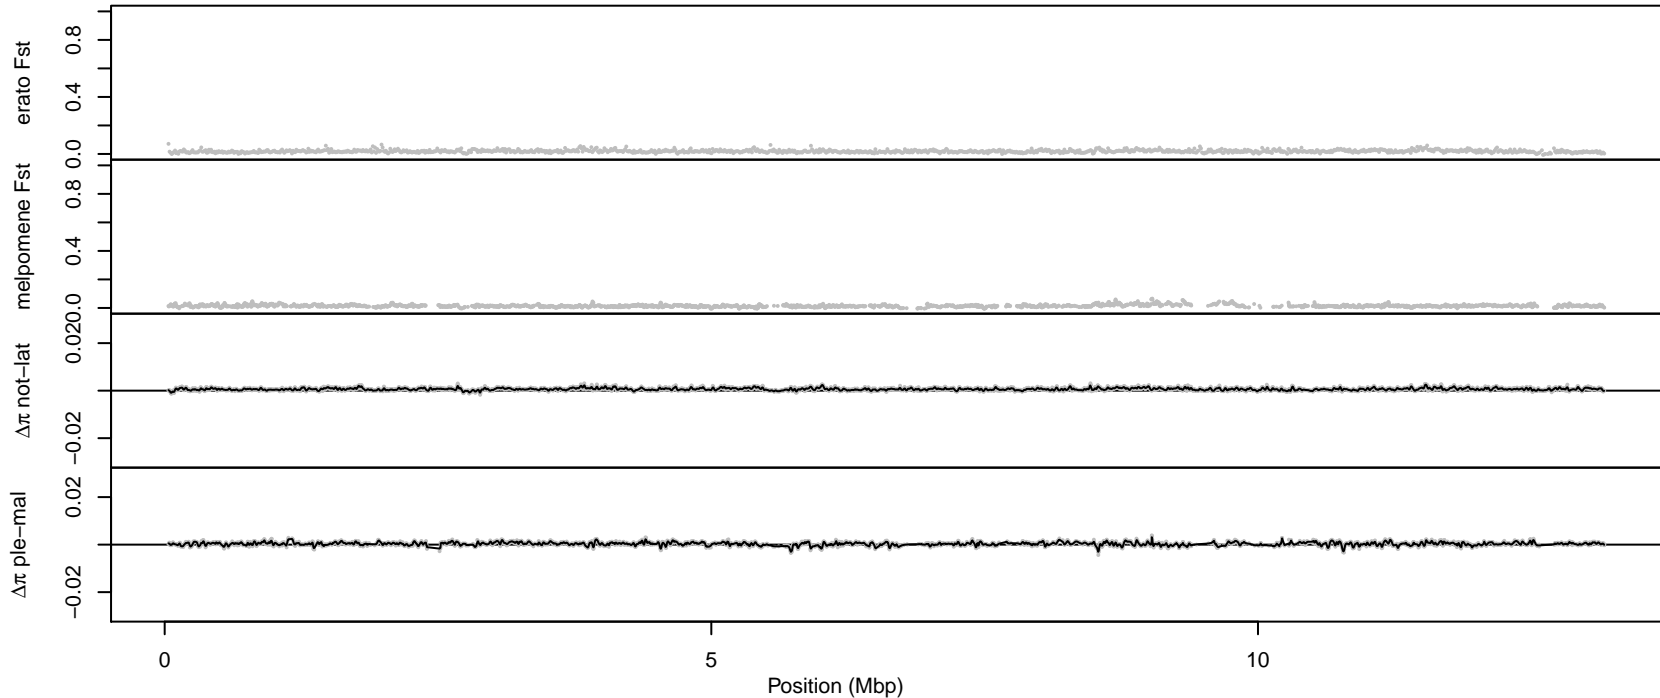

## chr10

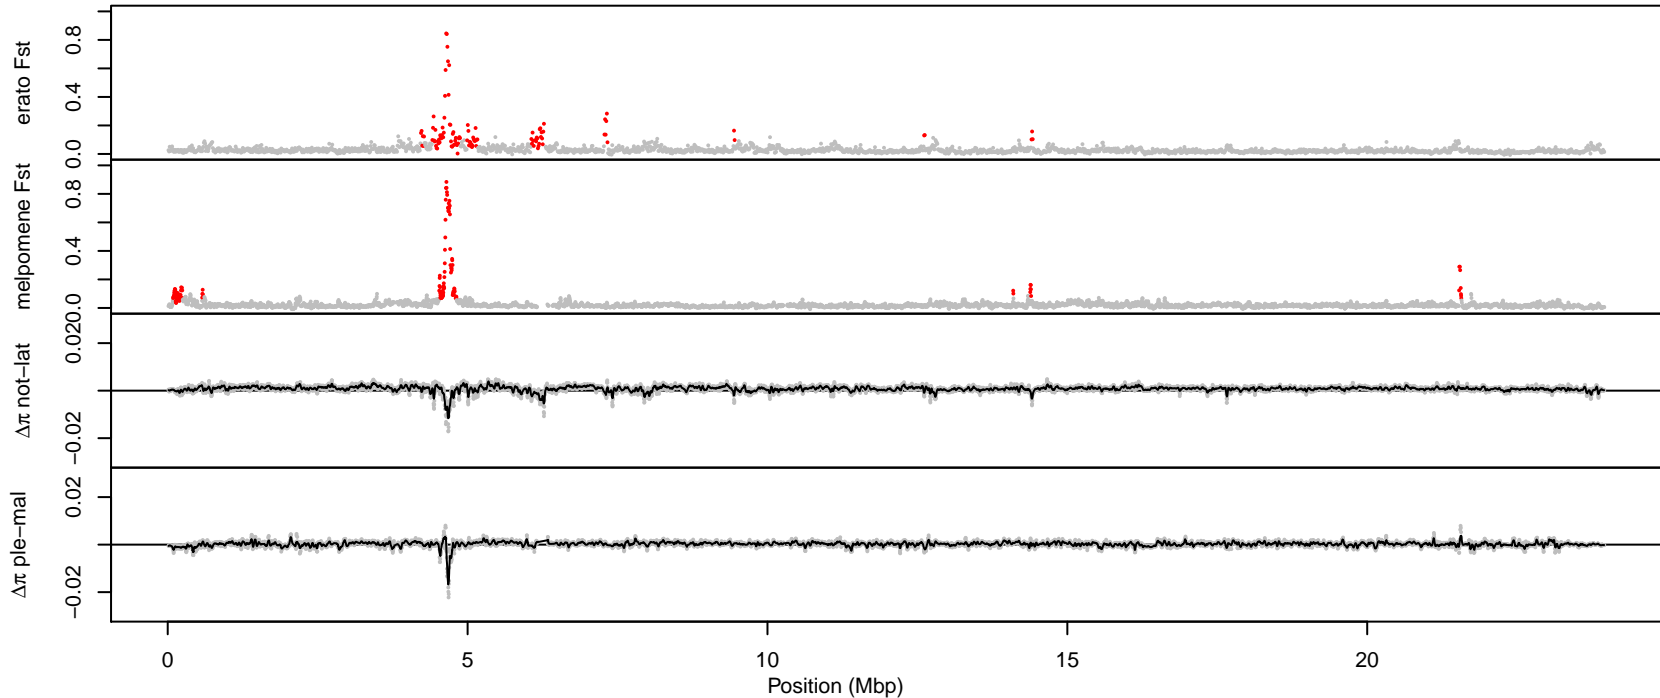

## chr11

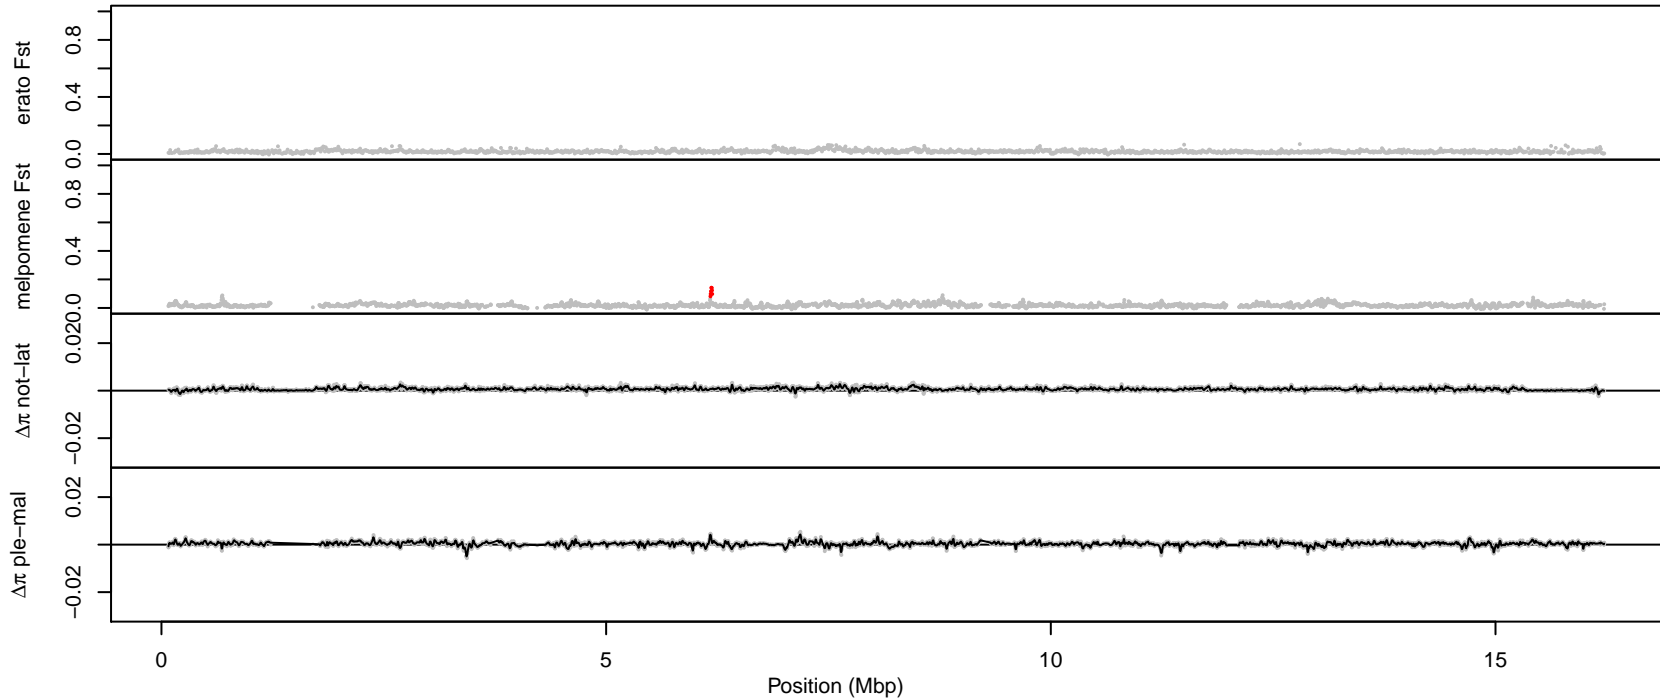

# chr12

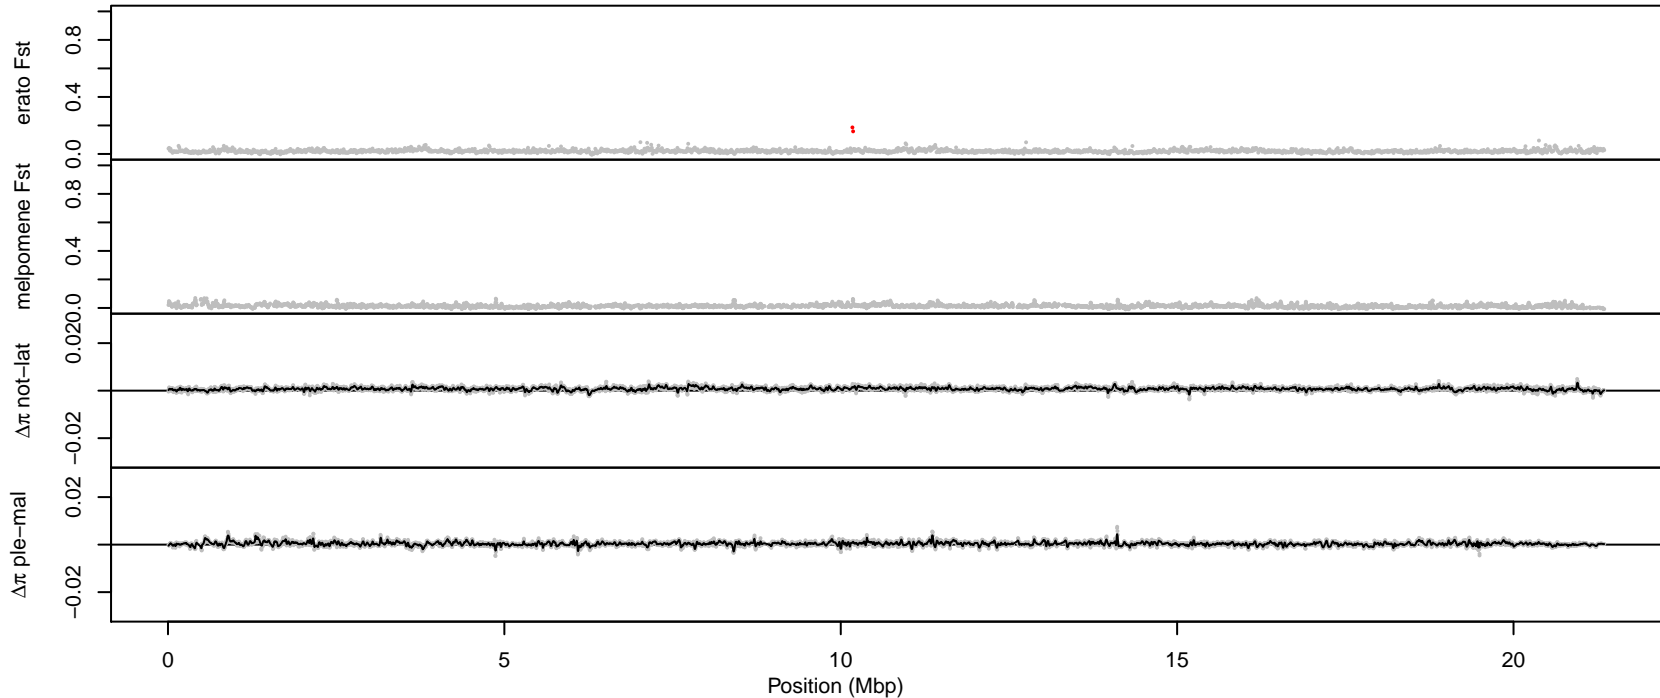

## chr13

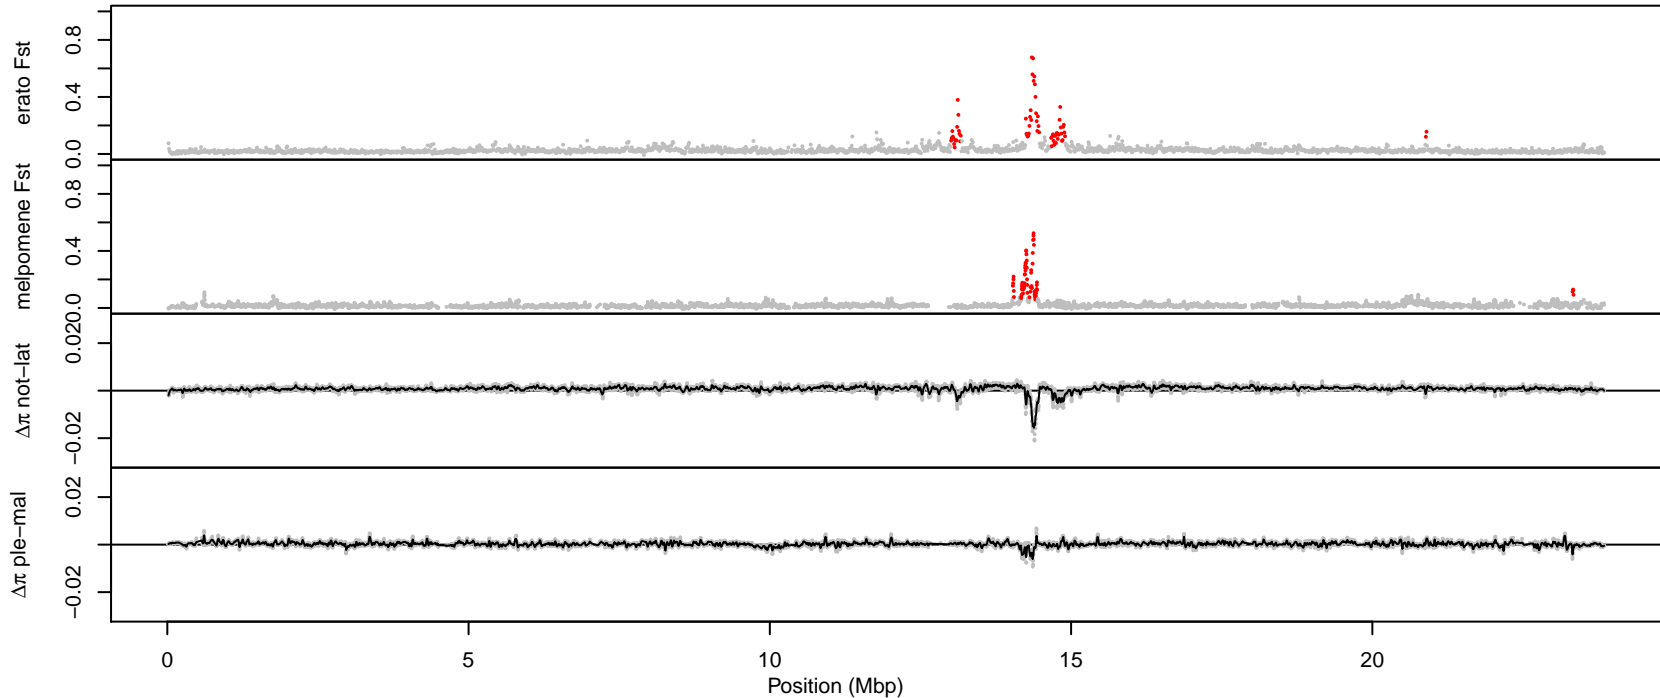

## chr14

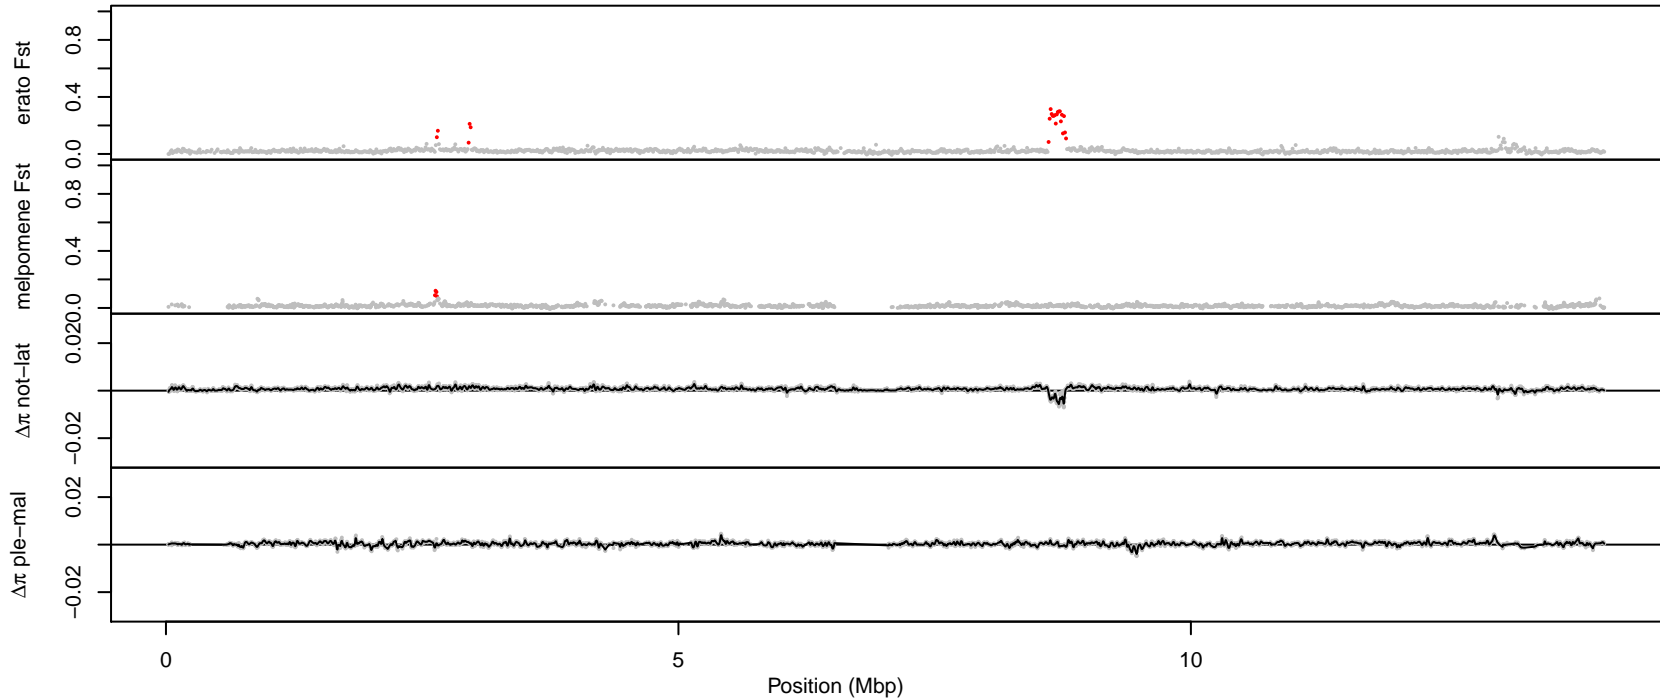

# chr15

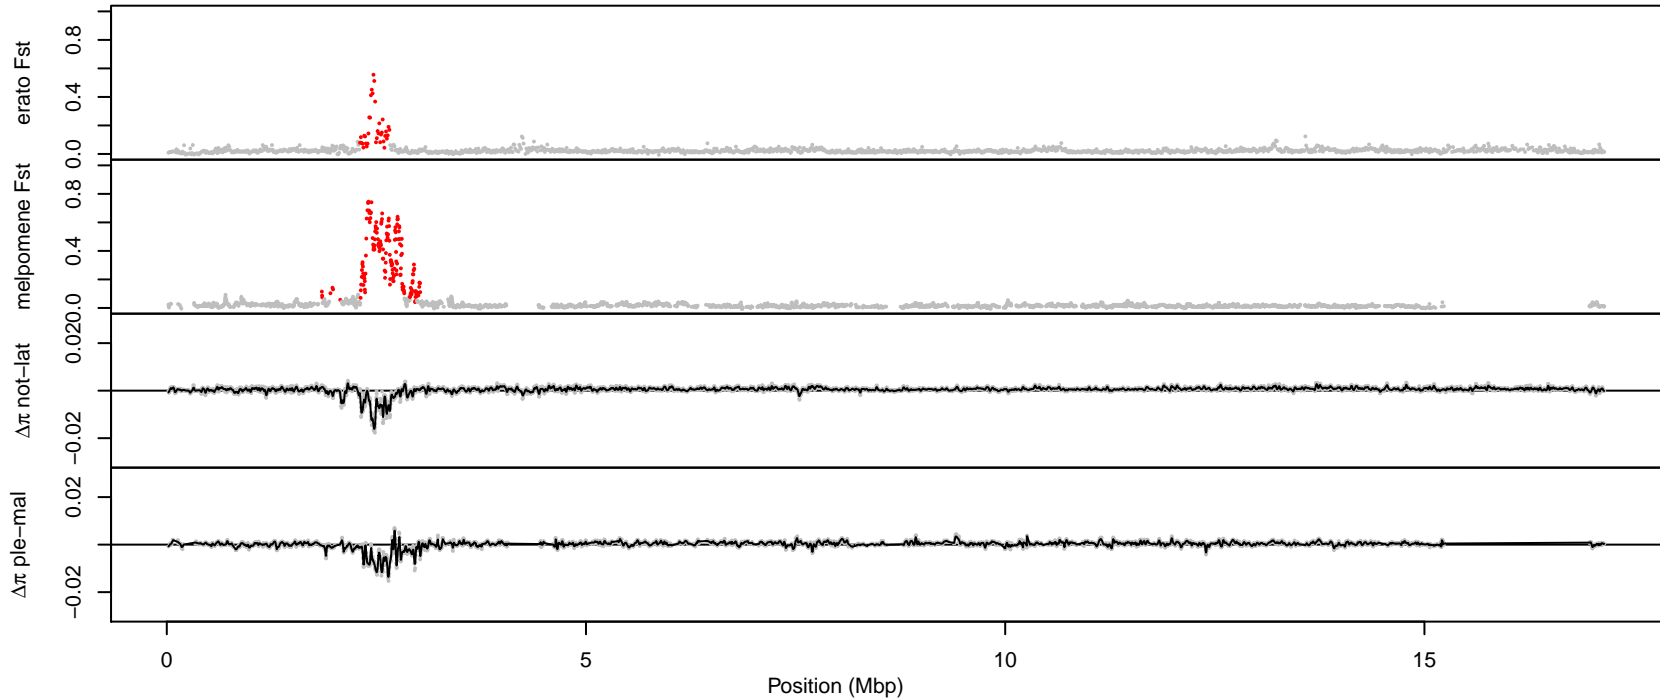

## chr16

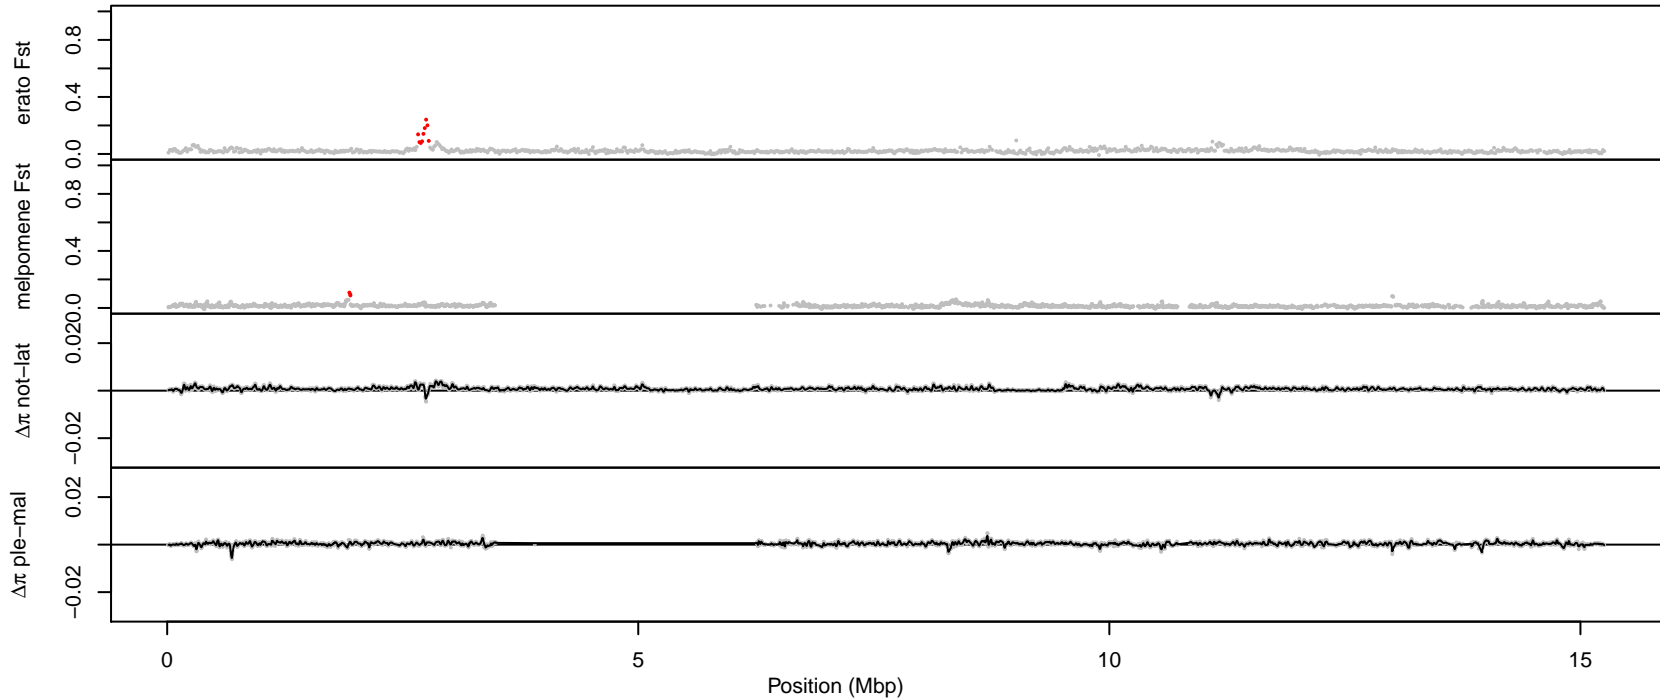



## chr17

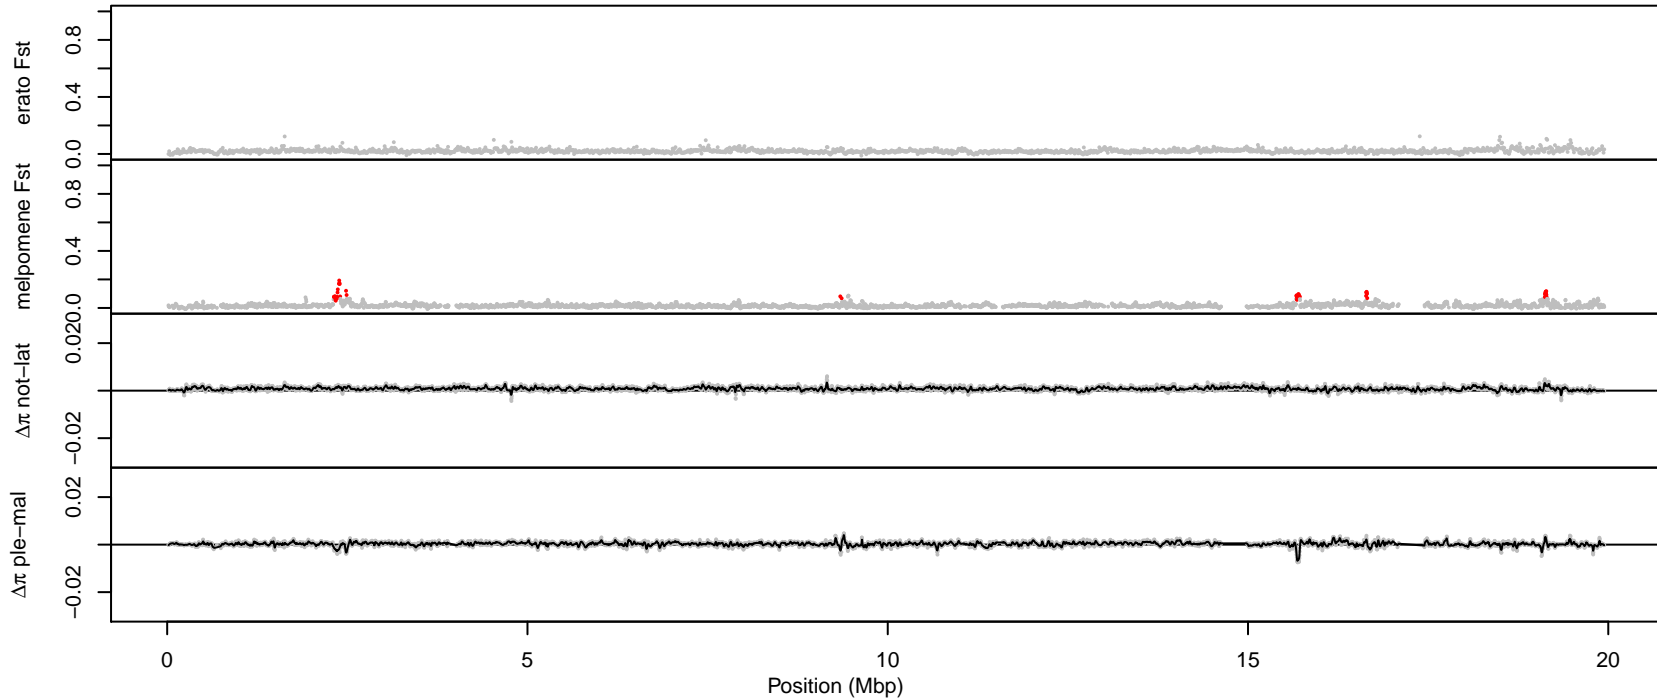

## chr18

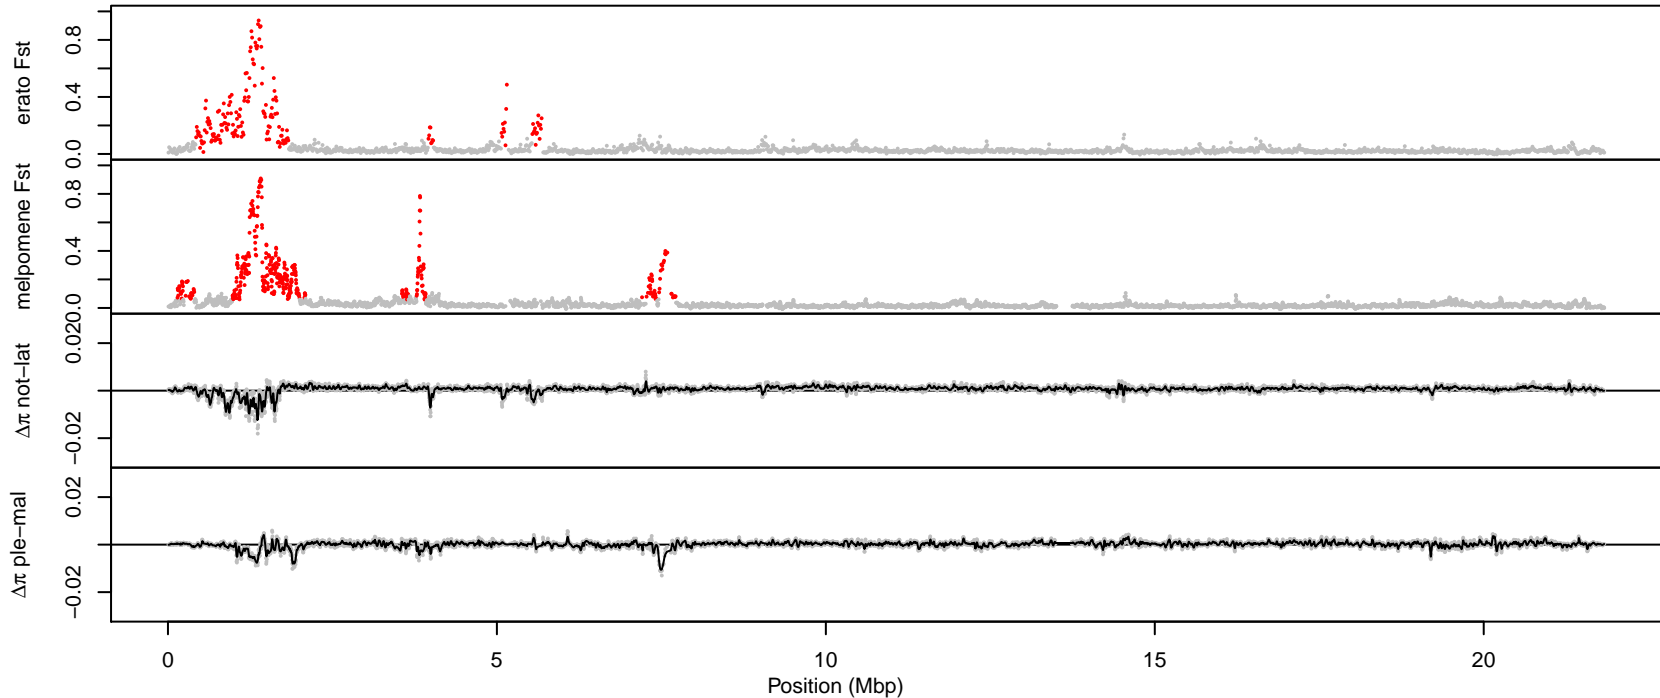

## chr19

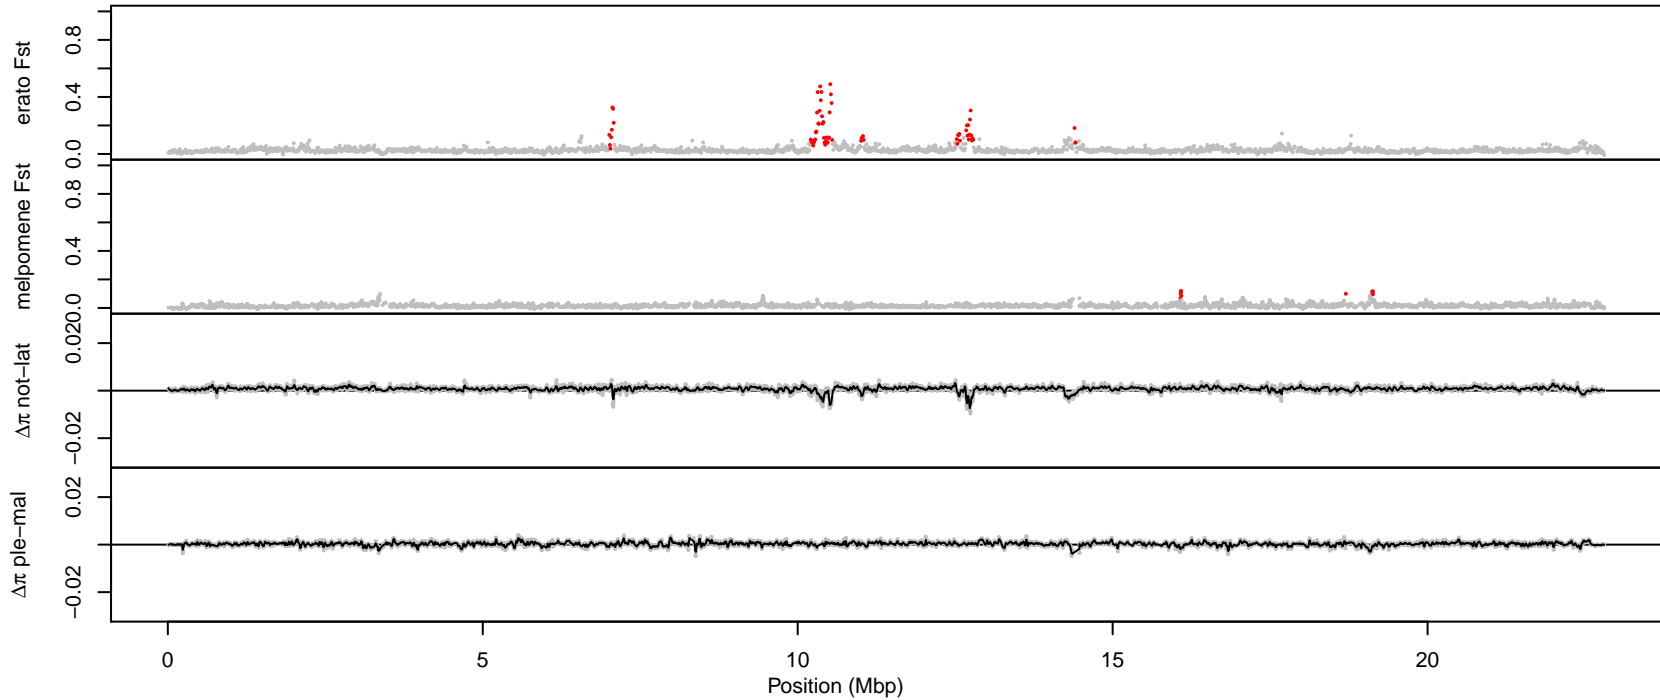

## chr20

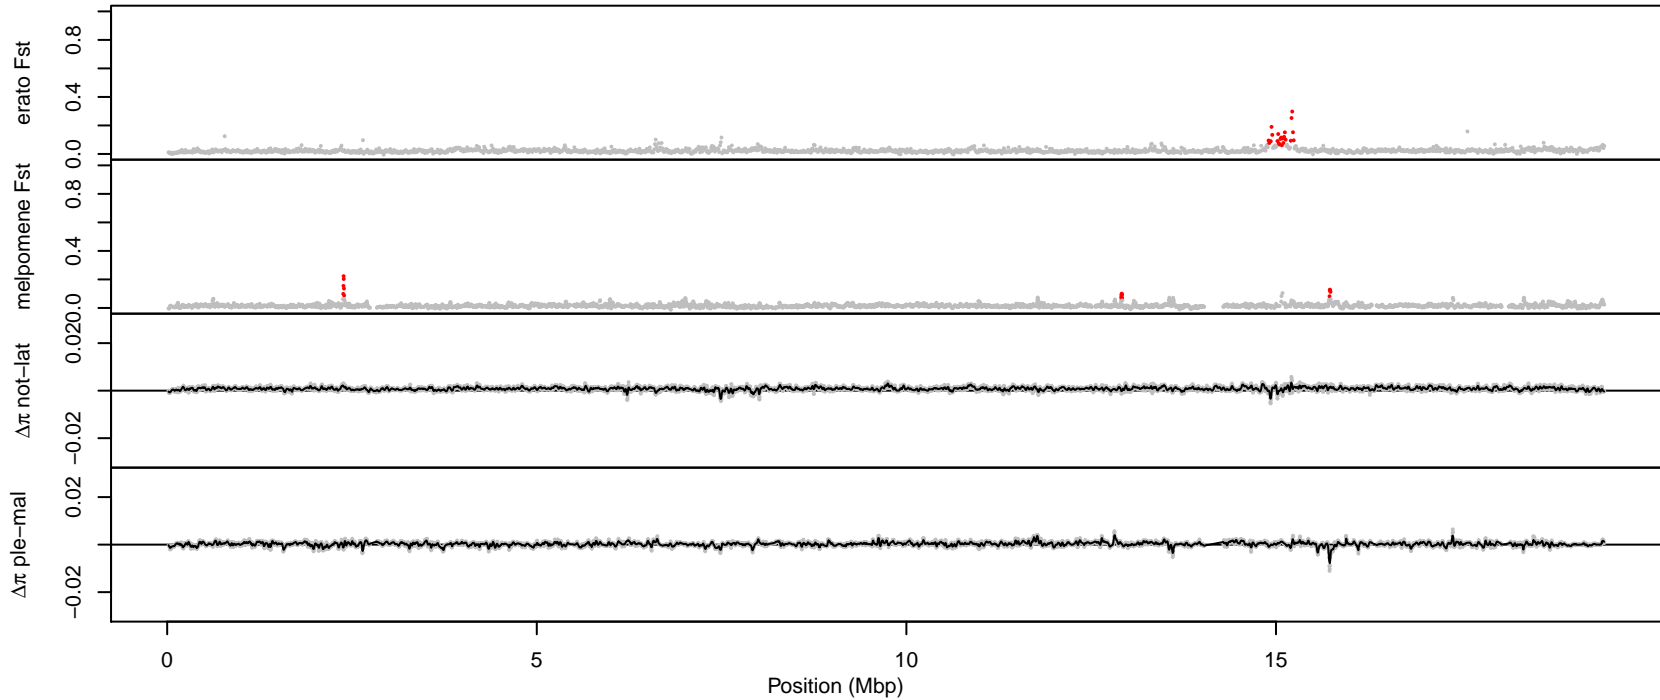

# Z chromosome

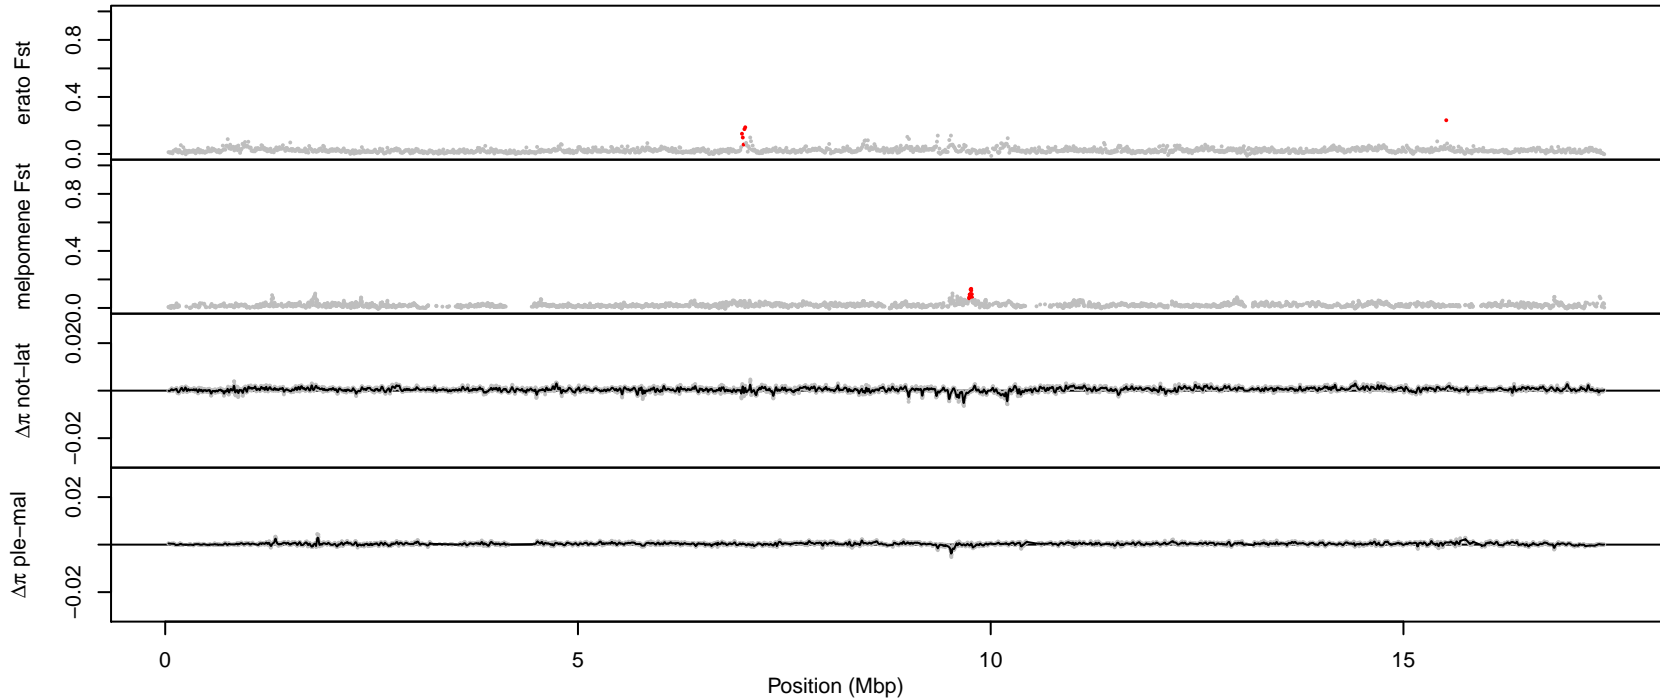

Supplement: Supplementary file [file media-5.pdf]
